# Supplementary material for: Trends in the Volume and Types of Primary Care Visits during the Two Years of the COVID-19 Pandemic in Israel
Source: MDPI journal article supplement (doi:10.3390/ijerph191710601), 2022-08-25
Supplement: s1 [file s1]

## Supplementary material:

**Figure S1: Daily COVID-19 cases in Israel**

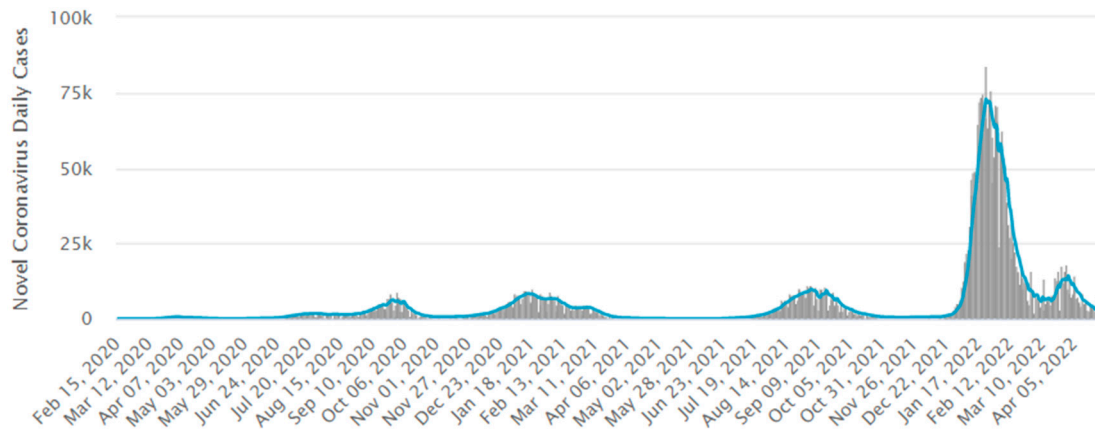

Legend: Y axis indicates Israel's daily numbers of COVID-19 cases. X axis indicates the calendar month.

Source: <https://www.worldometers.info/coronavirus/country/israel/>

**Table S1: Primary care visits by type and period**

| Type of visit                             |                            |                       | In-person visits |                  | Phone visits |                 | Asynchronous |                 | Total visits |                  |
|-------------------------------------------|----------------------------|-----------------------|------------------|------------------|--------------|-----------------|--------------|-----------------|--------------|------------------|
| Mean daily visit rates per 1000 persons   | Pre-COVID year             | March–December 2019   | 11.725           |                  | 0.678        |                 | 6.128        |                 | 18.531       |                  |
|                                           |                            | January–February 2020 | 13.21            |                  | 0.762        |                 | 7.188        |                 | 21.16        |                  |
|                                           | First COVID year           | March–December 2020   | 7.687            |                  | 3.9          |                 | 7.856        |                 | 19.443       |                  |
|                                           |                            | January–February 2021 | 7.849            |                  | 5.285        |                 | 8.718        |                 | 21.853       |                  |
|                                           | Second COVID year          | March–December 2021   | 9.589            |                  | 3.758        |                 | 8.353        |                 | 21.701       |                  |
|                                           |                            | January–February 2022 | 9.53             |                  | 8.68         |                 | 10.846       |                 | 29.056       |                  |
|                                           |                            |                       | Diff             | (95% CI)         | Diff         | (95% CI)        | Diff         | (95% CI)        | Diff         | (95% CI)         |
| Differences between corresponding periods | March–December 2019/2020   | Diff (95% CI)         | -4.038           | (-5.436, -2.641) | 3.222        | (2.618, 3.826)  | 1.728        | (0.702, 2.754)  | 0.911        | (-1.556, 3.379)  |
|                                           |                            | <i>p-value</i>        | 0.001>           |                  | 0.001>       |                 | 0.001>       |                 | NS           |                  |
|                                           | January–February 2020/2021 | Diff (95% CI)         | -5.36            | (-5.931, -4.790) | 4.523        | (-0.120, 9.166) | 1.53         | (-3.037, 6.098) | 0.693        | (-8.645, 10.031) |
|                                           |                            | <i>p-value</i>        | 0.001>           |                  | 0.053        |                 | NS           |                 | NS           |                  |
|                                           | March–December 2019/2021   | Diff (95% CI)         | -2.135           | (-3.533, -0.738) | 3.079        | (2.475, 3.684)  | 2.225        | (1.199, 3.251)  | 3.169        | (0.702, 5.637)   |
|                                           |                            | <i>p-value</i>        | 0.002            |                  | 0.001>       |                 | 0.001>       |                 | 0.01         |                  |
|                                           | January–February 2020/2022 | Diff (95% CI)         | -3.679           | (-4.250, -3.109) | 7.918        | (3.275, 12.561) | 3.658        | (-0.909, 8.225) | 7.897        | (-1.441, 17.234) |
|                                           |                            | <i>p-value</i>        | 0.001>           |                  | 0.012        |                 | 0.087        |                 | 0.076        |                  |
|                                           | March–December 2020/2021   | Diff (95% CI)         | 1.902            | (0.505, 3.301)   | -0.143       | (-0.747, 0.462) | 0.498        | (-0.528, 1.524) | 2.258        | (-0.210, 4.725)  |
|                                           |                            | <i>P-value</i>        | 0.006            |                  | NS           |                 | NS           |                 | 0.078        |                  |
|                                           | January–February 2021/2022 | Diff (95% CI)         | 1.681            | (1.110, 2.252)   | 3.395        | (-1.248, 8.038) | 2.128        | (-2.439, 6.695) | 7.204        | (-2.134, 16.541) |
|                                           |                            | <i>P-value</i>        | 0.002            |                  | NS           |                 | NS           |                 | 0.095        |                  |
